# Supplementary material for: The phageome of patients with ulcerative colitis treated with donor fecal microbiota reveals markers associated with disease remission
Source: PubMed Central journal article supplement (PMC11487140; doi:10.1038/s41467-024-53454-4), 2024-10-17
Supplement: 41467_2024_53454_MOESM1_ESM.pdf [file 41467_2024_53454_MOESM1_ESM.pdf]

## **The phageome of patients with ulcerative colitis treated with donor fecal microbiota reveals markers associated with disease remission**

Marwan E Majzoub<sup>1#</sup>, Sudarshan Paramsothy<sup>2,3#</sup>, Craig Haifer<sup>4,5#</sup>, Rohit Parthasarathy<sup>1</sup>, Thomas J Borody<sup>6</sup>, Rupert W Leong<sup>2,3</sup>, Michael A Kamm<sup>7,8</sup>, Nadeem O Kaakoush<sup>1\*</sup>

<sup>1</sup>School of Biomedical Sciences, Faculty of Medicine and Health, UNSW Sydney, NSW 2052, Australia

<sup>2</sup>Concord Clinical School, University of Sydney, Sydney, NSW 2006, Australia

<sup>3</sup>Department of Gastroenterology, Concord Repatriation General Hospital, Sydney, NSW 2139, Australia

<sup>4</sup>School of Clinical Medicine, Faculty of Medicine and Health, UNSW Sydney, NSW 2052, Australia

<sup>5</sup>Department of Gastroenterology, St Vincent's Hospital, Sydney, NSW 2010, Australia

<sup>6</sup>Centre for Digestive Diseases, Sydney, NSW 2046, Australia

<sup>7</sup>Department of Gastroenterology, St Vincent's Hospital, Melbourne, Vic 3065, Australia

<sup>8</sup>Department of Medicine, University of Melbourne, Melbourne, Vic 3010, Australia

#These authors contributed equally.

### **Correspondence:**

Scientia A/Prof Nadeem O Kaakoush

School of Biomedical Sciences, Faculty of Medicine and Health

University of New South Wales, Sydney, NSW 2052, Australia

Tel: + 61 2 9065 9728; Email: n.kaakoush@unsw.edu.au

### Supplementary Figure 1

**Quality assessment of phage identification. A:** Jaccard similarity of the donor batches (D1, D5, D6, D10, D11, D14, D15, D17, D19, D20, D22, D24, D25, D28, D29, D31, D32) to the individual donors included (Yes, pink; n=4, 7, 5, 5, 6, 6, 6, 6, 7, 6, 5, 5, 5, 6, 6, 7, 7, respectively) and not included (No, yellow; n=10, 7, 9, 9, 8, 8, 8, 8, 7, 8, 9, 9, 9, 8, 8, 7, 7, respectively) in the batch. Differences were tested using two-way ANOVA with Batch x Inclusion as variables. All FOCUS vOTUs (n=7066) were included in the analysis. Errors are  $\pm$  SEM. **B:** Pielou's evenness in the individual donors (n=14) and batches (n=17). Differences were tested using a two-sided Welch's t-test ( $p=0.0009$ ) following assessment of normal distribution with Shapiro-Wilk test (Donors:  $p=0.6542$ , Batches:  $p=0.1368$ ) and variances with F test ( $p<0.0001$ ). **C:** Principal coordinate analysis (PCO) on Bray-Curtis similarities between individual donor (green) and donor batch samples (purple). Differences between groups were tested using PERMANOVA and PERMDISP. Source data are provided as a Source Data file.

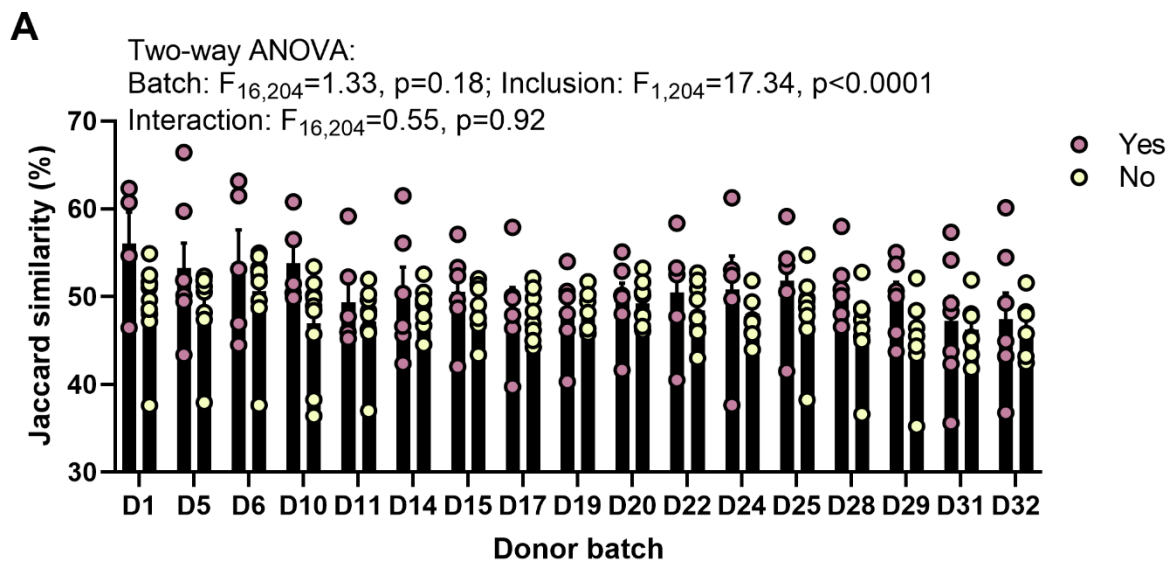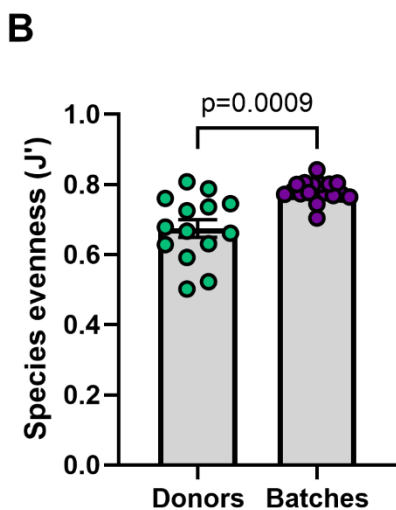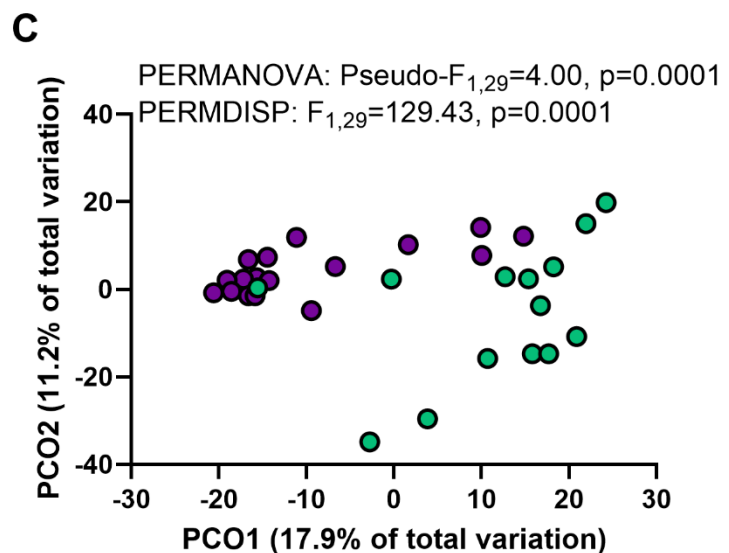

## Supplementary Figure 2

**Phage diversity in healthy individuals. A:** Principal coordinate analysis (PCO) on Bray-Curtis similarities between samples from the individual donors. All FOCUS vOTUs (n=7066) were included in the analysis. 14 donors in FOCUS were included and sampled at their baseline (0 months). 13 of 14 were sampled a second time over a period ranging from 0.3 to 17 months (blue points). **B:** Linear regression between Bray-Curtis similarities intra-donor against time (months). Center line is linear regression equation and broken lines represent 95% confidence intervals. Source data are provided as a Source Data file.

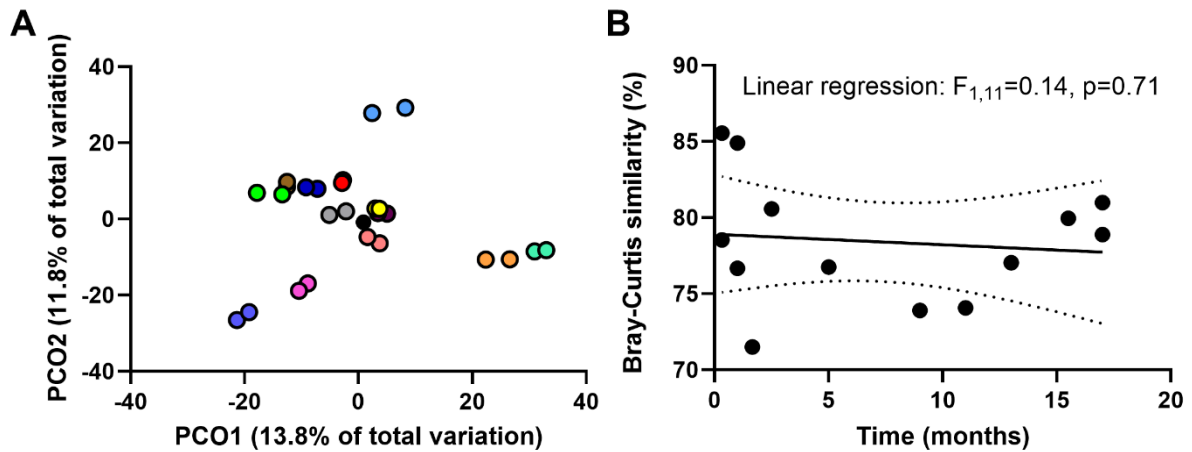

### Supplementary Figure 3

**Phage beta-diversity in active ulcerative colitis. A:** Principal coordinate analysis (PCO) on Bray-Curtis similarities between individual donors (green; n=14) and patient samples (purple; n=53). Differences between groups were tested using PERMANOVA and PERMDISP. FOCUS vOTUs that were classified as a virus (n=2737) were included in the analysis. **B:** Principal coordinate analysis (PCO) on Bray-Curtis similarities between patients at baseline (Baseline, green; n=31) and patients following antibiotic treatment (Post Abx, purple; n=32). Differences between groups were tested using PERMANOVA and PERMDISP. LOTUS vOTUs that were classified as a virus (n=25941) were included in the analysis. Source data are provided as a Source Data file.

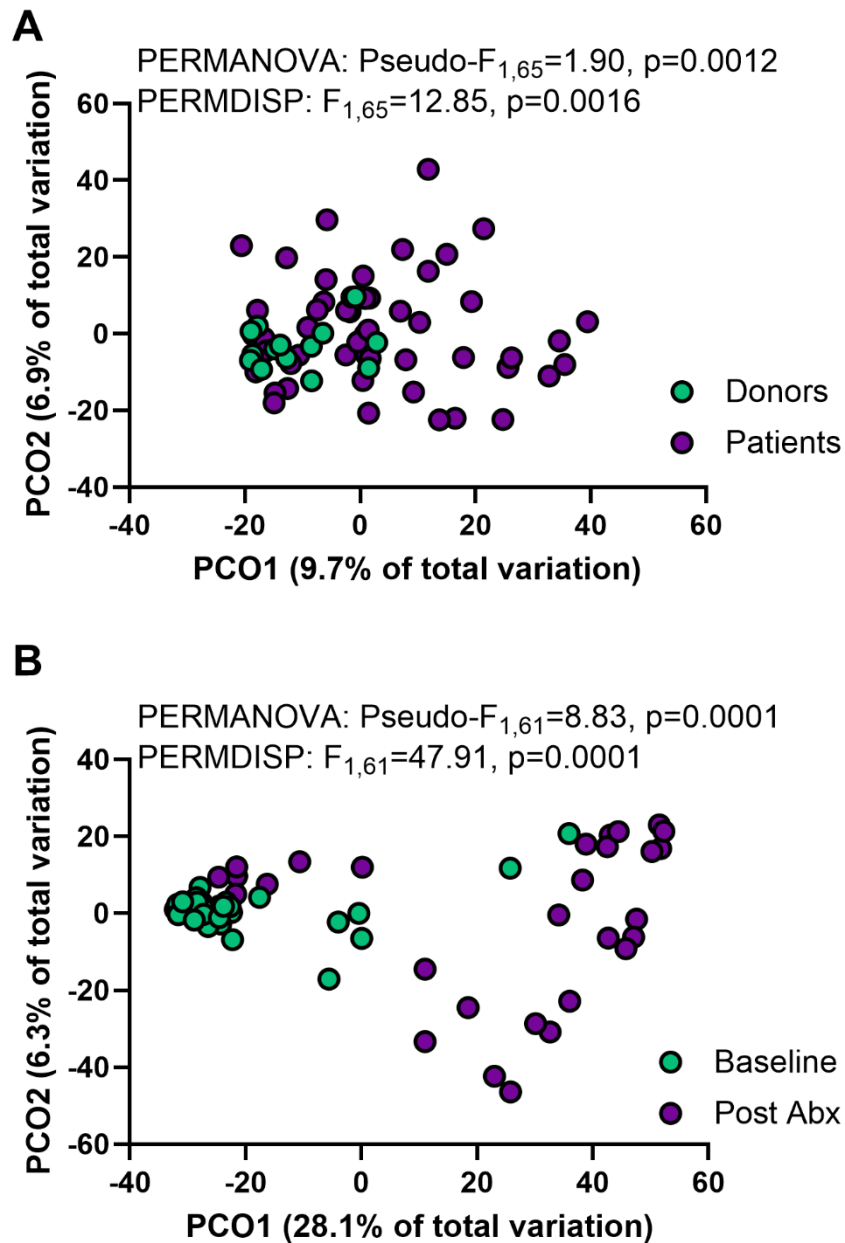

### Supplementary Figure 4

**Effect of fecal microbiota transplantation on phage diversity.** FOCUS and LOTUS vOTUs that were classified as a virus ( $n=2737$  and  $n=25941$ , respectively) were included in the analysis where applicable. **A:** Principal coordinate analysis (PCO) on Bray-Curtis similarities for FOCUS samples across all groups. Donor batches (Donors,  $n=17$ ), patients at baseline (Tx0,  $n=53$ ), post 8 weeks of placebo (P8,  $n=21$ ), 4 weeks of FMT (Tx4,  $n=53$ ), 8 weeks of FMT (Tx8,  $n=53$ ) and at follow-up 8 weeks following FMT (TxF,  $n=53$ ). Differences between groups were tested using PERMANOVA and PERMDISP. **B:** Margalef's (species) richness across time during FMT or placebo in LOTUS (including Donors and Baseline). Errors are  $\pm$  SEM. **C:** Principal coordinate analysis (PCO) on Bray-Curtis similarities for LOTUS samples across all groups. Donors,  $n=29$  samples from 2 donors; Baseline,  $n=31$  patients; Post Abx,  $n=32$  patients; Placebo,  $n=75$  samples; FMT,  $n=61$  samples. Differences between groups were tested using PERMANOVA and PERMDISP. Source data are provided as a Source Data file.

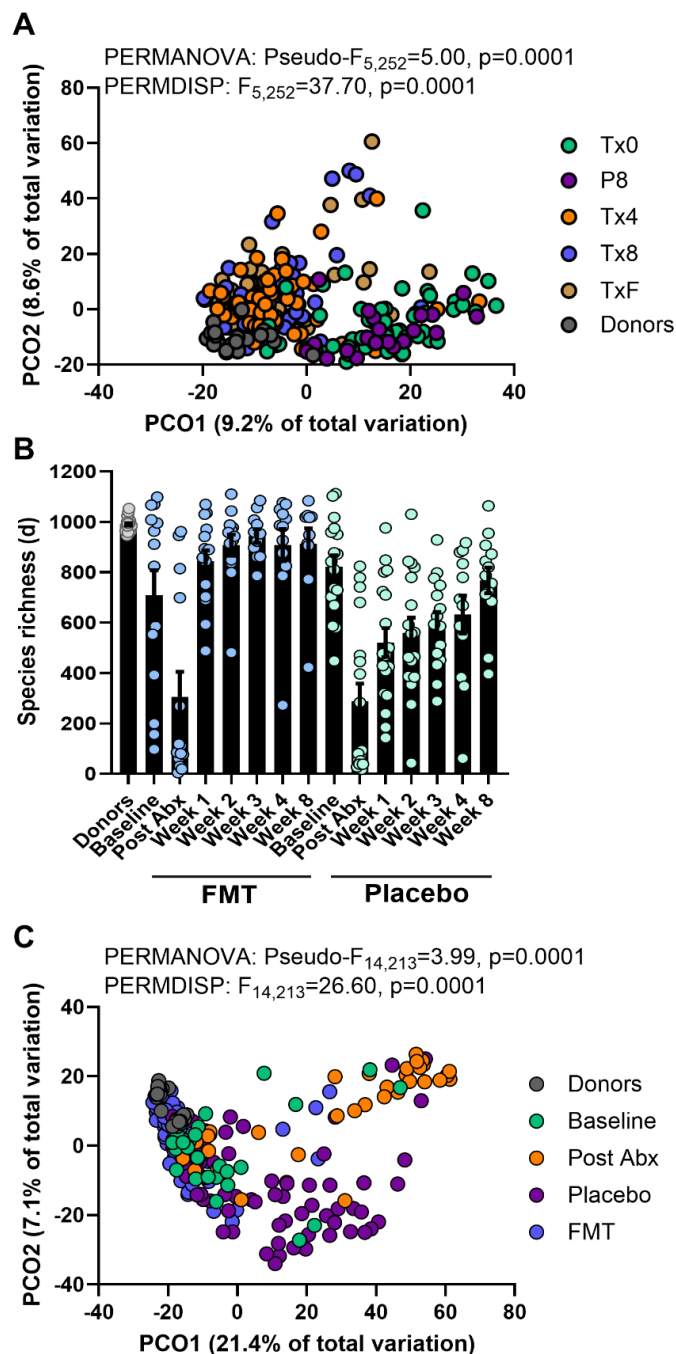

### Supplementary Figure 5

**Effect of FMT and placebo on relative abundance of vOTUs.** FOCUS vOTUs that were classified as a virus (n=2737) were included in the analysis that was performed using ZicoSeq. **A:** Differential abundance analysis between patients at baseline (Tx0; n=53) and patients following 8 weeks of placebo (P8; n=21). **B:** Differential abundance analysis between patients at baseline (Tx0; n=53) and patients following 8 weeks of FMT (Tx8; n=53). **C:** Differential abundance analysis between patients at baseline (Tx0; n=53) and patients at follow-up 8 weeks after FMT treatment (TxF; n=53).

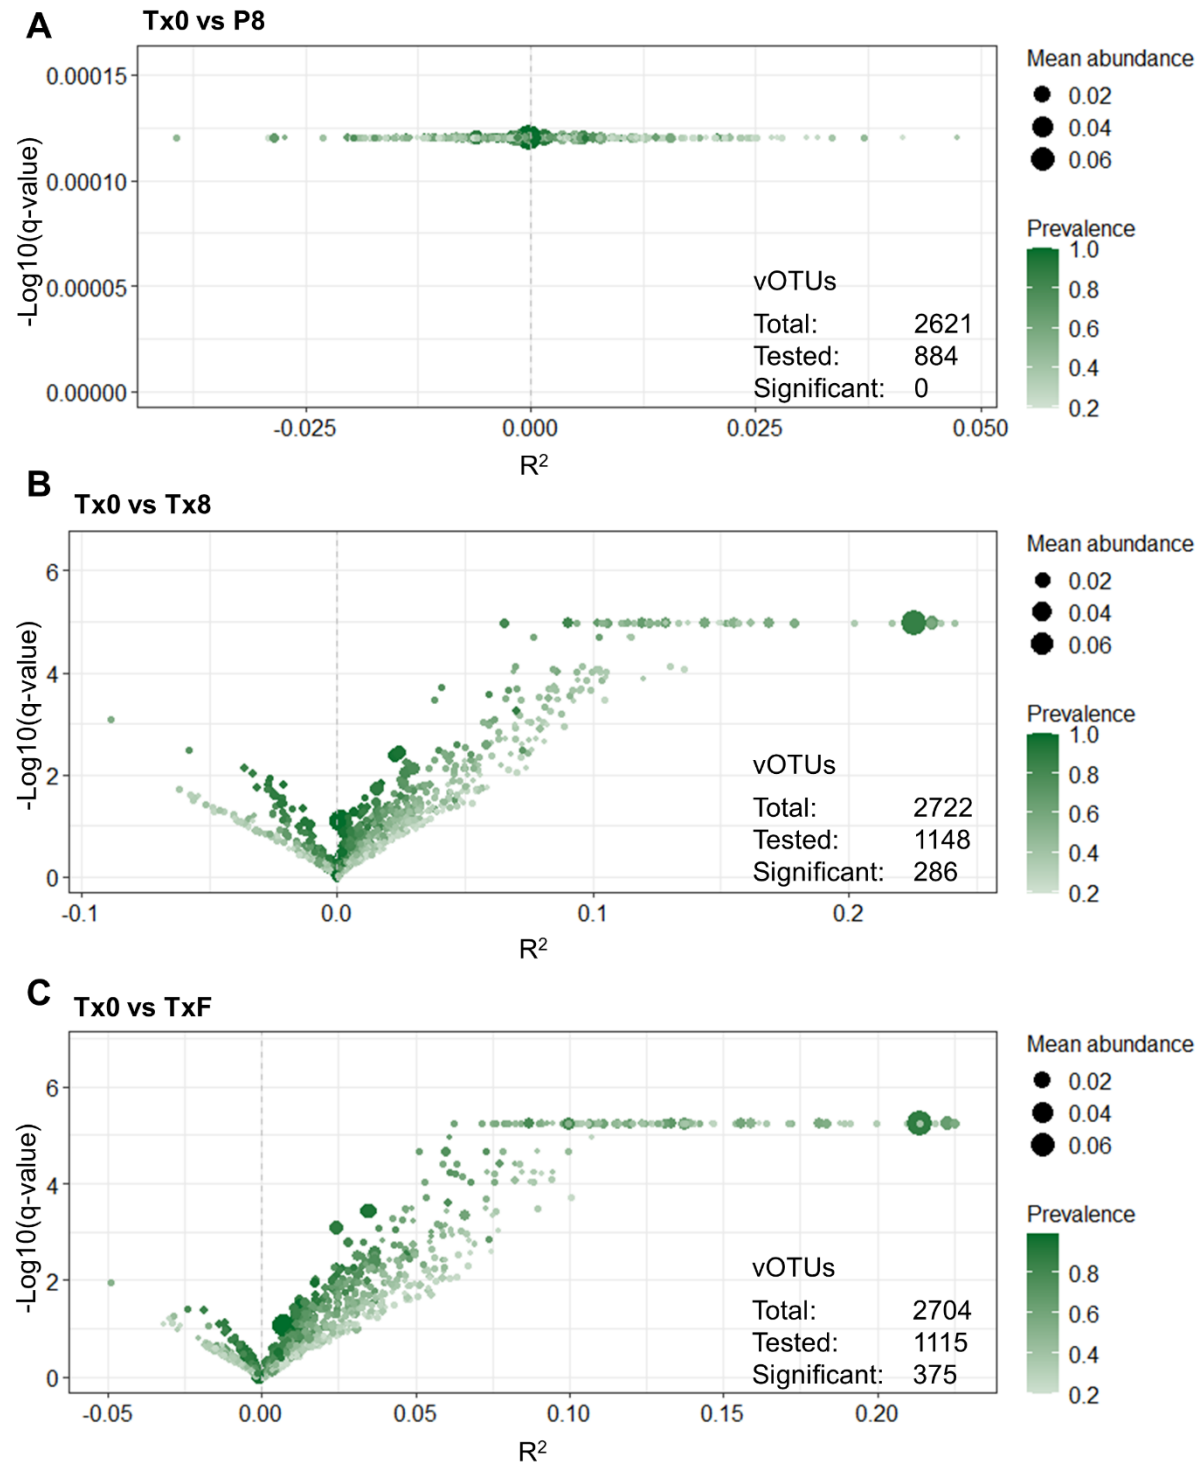

### Supplementary Figure 6

**Effect of FMT and placebo on relative abundance of vOTUs.** LOTUS vOTUs that were classified as a virus (n=25941) were included in the analysis. **A:** Differential abundance analysis between patients at baseline (Baseline; n=17) and patients following 8 weeks of placebo (Post-placebo; n=13). **B:** Differential abundance analysis between patients at baseline (Baseline; n=14) and patients following 8 weeks of FMT (Post-FMT; n=10). **C:** Classification of 46 vOTUs found to be differentially abundant with FMT. Source data are provided as a Source Data file.

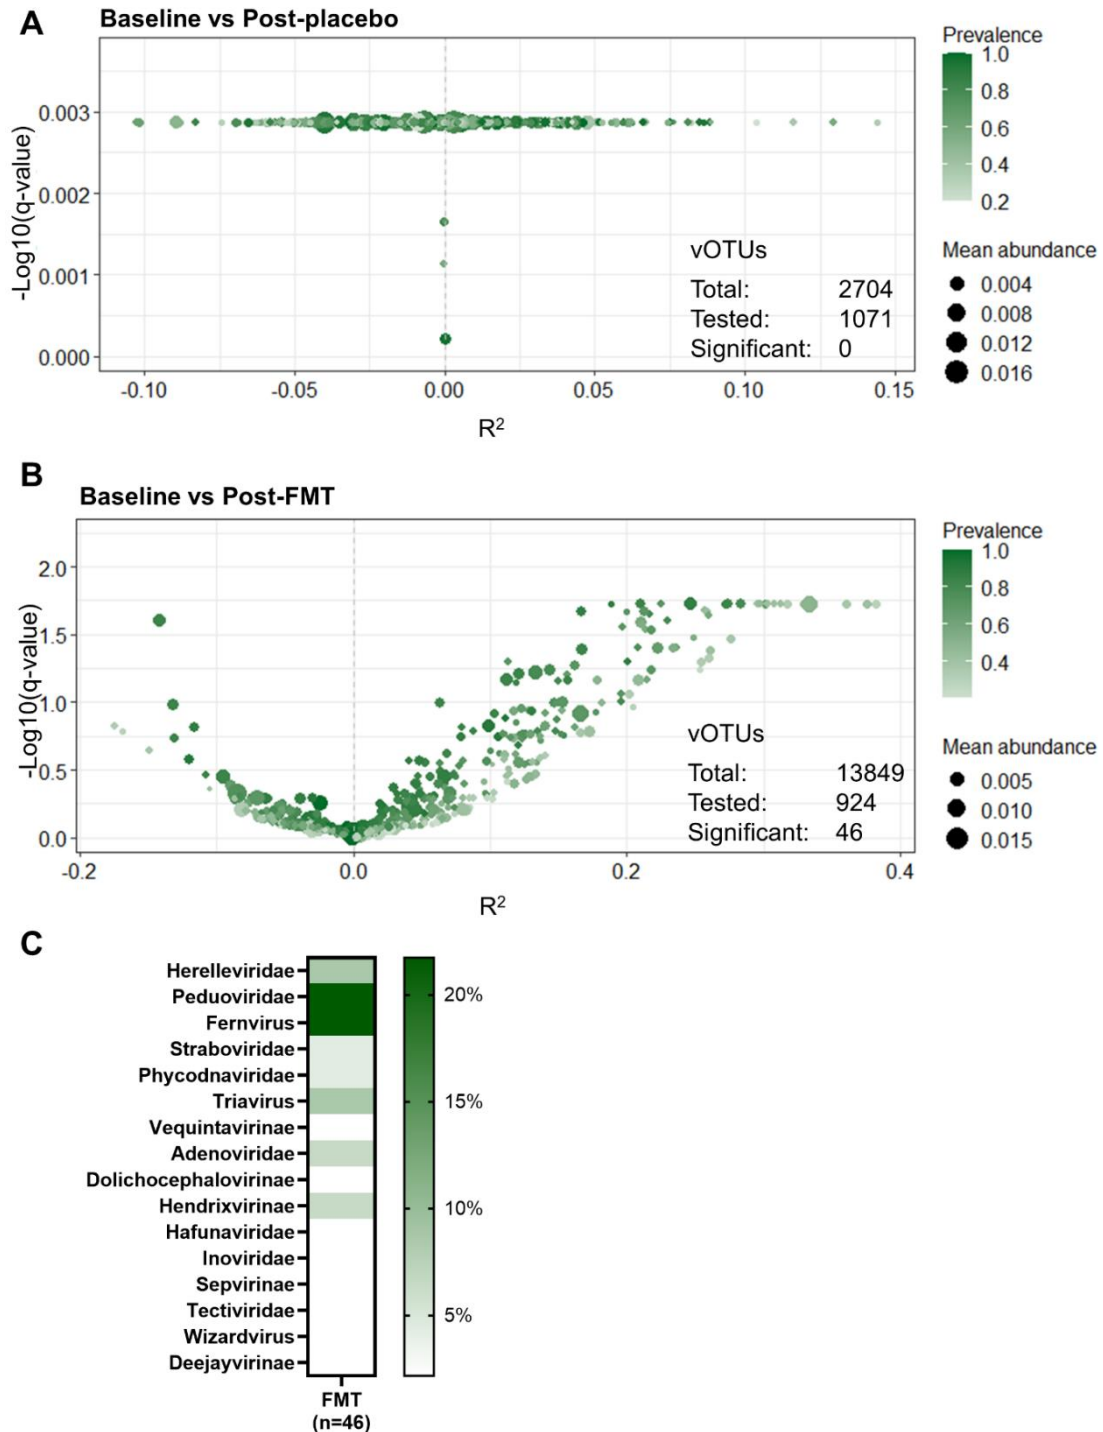

### Supplementary Figure 7

**Phage diversity and response to fecal microbiota transplantation.** FOCUS and LOTUS vOTUs that were classified as a virus ( $n=2737$  and  $n=25941$ , respectively) were included in the analysis where applicable. **A:** Principal coordinate analysis (PCO) on Bray-Curtis similarities for FOCUS samples across all groups. Differences between groups were tested using PERMANOVA and PERMDISP. Non-responders at baseline (Tx0N,  $n=35$ ), responders at baseline (Tx0Y,  $n=18$ ), non-responders post FMT (Tx8N,  $n=35$ ) and responders post FMT (Tx8Y,  $n=18$ ). **B:** Effect of FMT on Margalef's (species) richness in non-responders and responders in the LOTUS trial. Differences were tested with a two-way repeated measures ANOVA and multiple comparisons testing was performed using an uncorrected Fisher's LSD. **C:** Principal coordinate analysis (PCO) on Aitchinson distances between LOTUS donors, responders and non-responders at baseline and post-FMT. Differences between groups were tested using PERMANOVA and PERMDISP. Baseline\_n,  $n=7$ ; Baseline\_y,  $n=7$ ; Post FMT\_n,  $n=7$ ; Post FMT\_y,  $n=7$ . Source data are provided as a Source Data file.

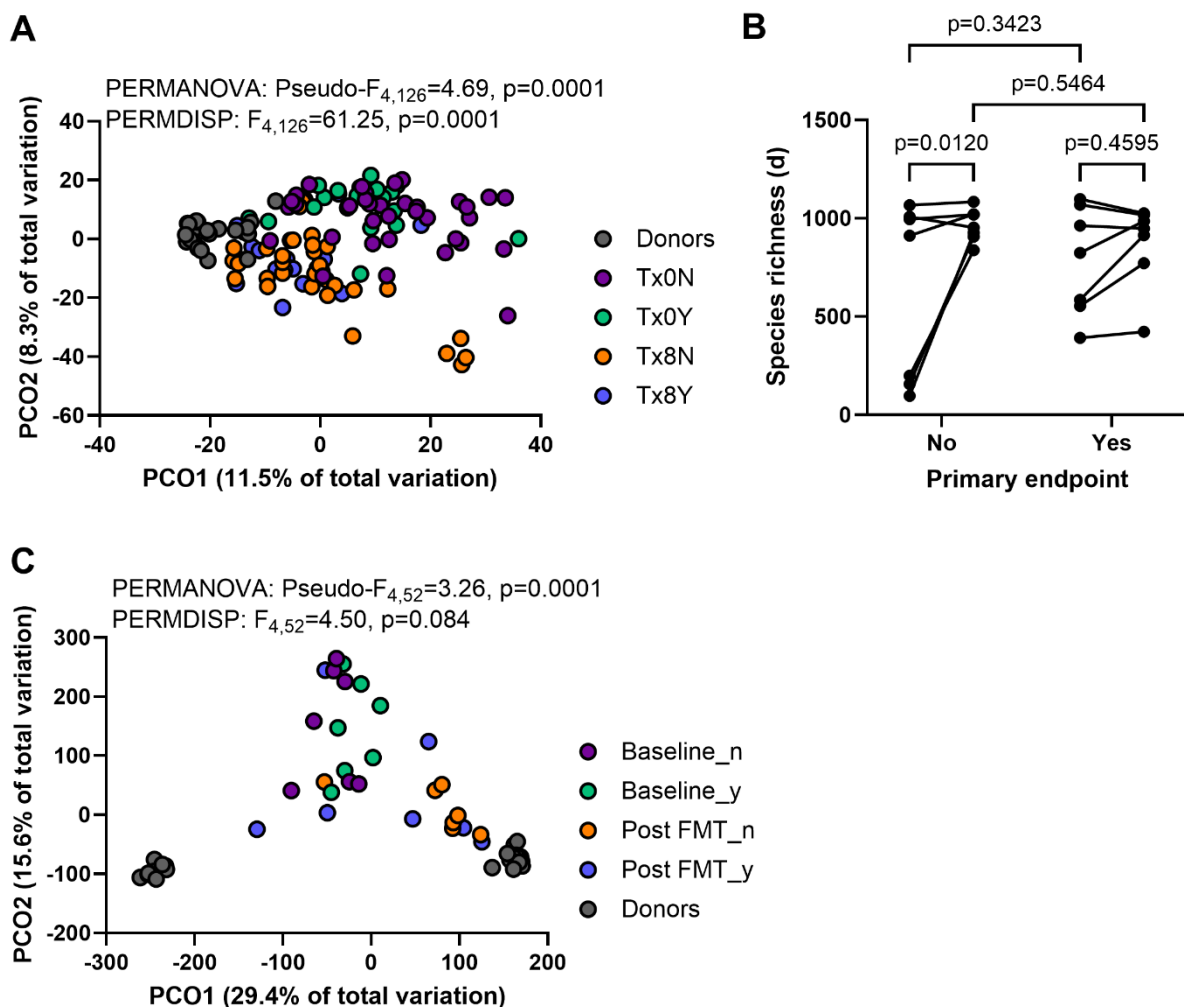



### Supplementary Figure 8

**Phage diversity during maintenance therapy or withdrawal.** LOTUS vOTUs classified as a virus (n=25941) were included in the analysis. **A:** Principal coordinate analysis (PCO) on Bray-Curtis similarities for LOTUS samples across all groups. Differences between groups were tested using PERMANOVA and PERMDISP. FMT\_i: patients at end of induction FMT therapy that went into maintenance arm (n=4), FMT\_m: patients at end of maintenance FMT therapy (n=4), Flare\_i: patients at end of induction FMT therapy that went into withdrawal arm (n=4), Flare\_m: patients who withdrew from therapy around the time of disease flare (n=4). **B, C:** Changes in the relative abundances of the remaining LOTUS vOTUs that were homologous to vOTU\_151 in FOCUS. Differences were tested with a two-way repeated measures ANOVA and multiple comparisons testing was performed using an uncorrected Fisher's LSD. Source data are provided as a Source Data file.

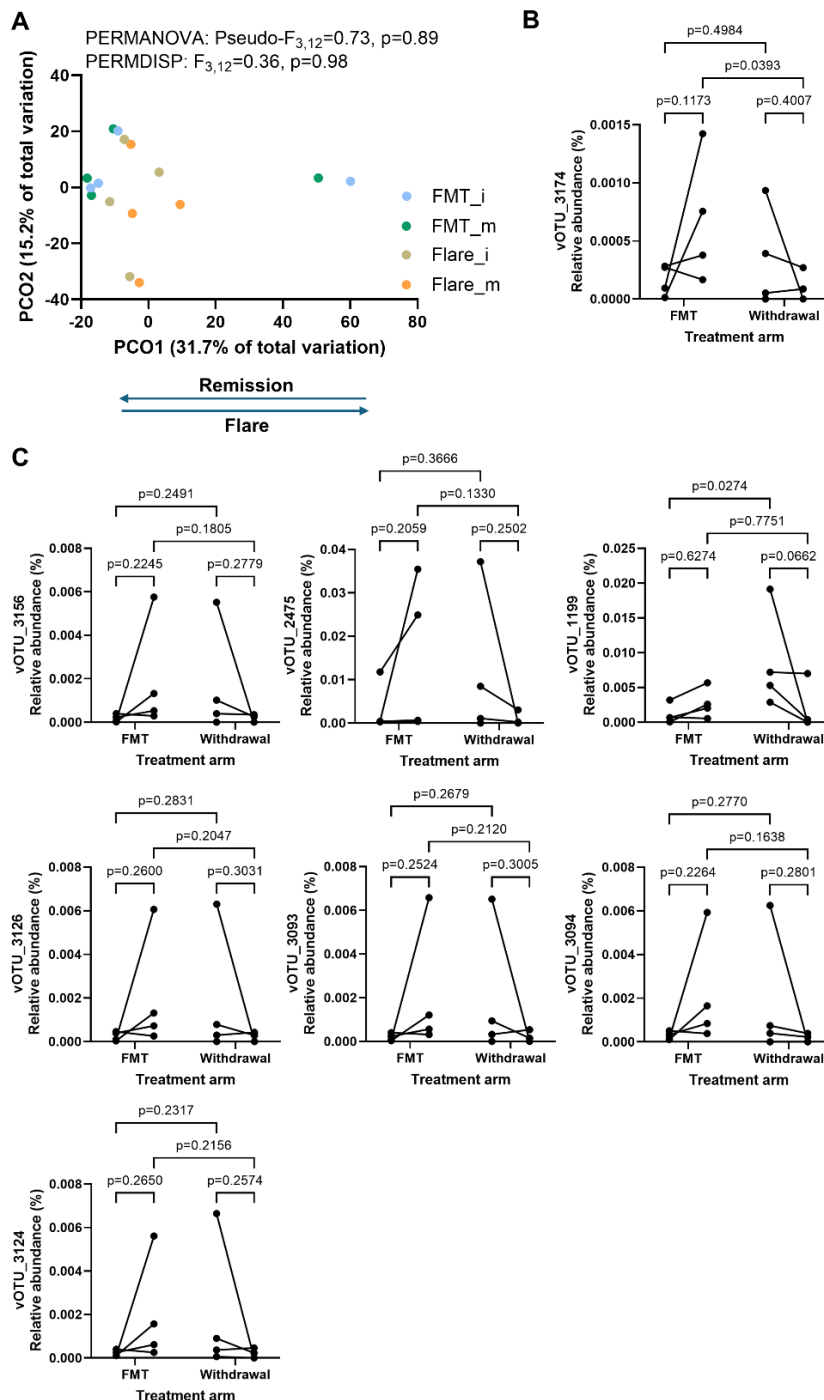

**Supplementary Table 1**

**Results of similarities searches between phages and bacteria.** Short-read data: Results of blastn searches between vOTUs of interest from FOCUS and LOTUS and the nucleotide database at NCBI limited to bacterial taxa (taxid: 2). All vOTUs showed high coverage and identity to the assembled genome of isolate *Oscillospiraceae* CE91-St42. Long-read data: Results of blastn searches between long-read contigs of interest and the nucleotide database at NCBI limited to bacterial taxa (taxid: 2). All contigs showed high identity to the assembled genome of isolate *Oscillospiraceae* CE91-St42 but only contig\_6261 had high coverage.

| <b>Short-read data</b> |                                   |                                |
|------------------------|-----------------------------------|--------------------------------|
| <b>vOTU ID</b>         | <b>Blastn hit</b>                 | <b>Coverage / Identity (%)</b> |
| 151                    | <i>Oscillospiraceae</i> CE91-St42 | 98 / 98.7                      |
| 3124                   | <i>Oscillospiraceae</i> CE91-St42 | 83 / 98.68                     |
| 2578                   | <i>Oscillospiraceae</i> CE91-St42 | 89 / 98.71                     |
| 3315                   | <i>Oscillospiraceae</i> CE91-St42 | 94 / 98.32                     |
| 3126                   | <i>Oscillospiraceae</i> CE91-St42 | 99 / 99.61                     |
| 3093                   | <i>Oscillospiraceae</i> CE91-St42 | 99 / 99.5                      |
| 3094                   | <i>Oscillospiraceae</i> CE91-St42 | 99 / 99.37                     |
| 2838                   | <i>Oscillospiraceae</i> CE91-St42 | 99 / 99.52                     |
| 3156                   | <i>Oscillospiraceae</i> CE91-St42 | 99 / 99.5                      |

  

| <b>Long-read data</b> |                                   |                                |
|-----------------------|-----------------------------------|--------------------------------|
| <b>Contig</b>         | <b>Blastn hit</b>                 | <b>Coverage / Identity (%)</b> |
| 6261                  | <i>Oscillospiraceae</i> CE91-St42 | 99 / 99.37                     |
| 7310                  | <i>Oscillospiraceae</i> CE91-St42 | 24 / 100                       |
| 46131                 | <i>Oscillospiraceae</i> CE91-St42 | 20 / 97.48                     |
| 46654                 | <i>Oscillospiraceae</i> CE91-St42 | 16 / 91.83                     |
| 51638                 | <i>Oscillospiraceae</i> CE91-St42 | 2 / 93.05                      |
